# Supplementary material for: Rechargeable and highly stable Mn metal batteries based on organic electrolyte
Source: Royal Society of Chemistry journal article supplement (doi:10.1039/d2cc05808a), 2022-12-24
Supplement: d2cc05808a1.pdf [file d2cc05808a1.pdf]

# Rechargeable and Highly Stable Mn Metal Batteries Based on Organic Electrolyte

Xincheng He,<sup>a</sup> Zipeng Li,<sup>a</sup> Run Tang,<sup>a</sup> Yingying Chen,<sup>a</sup> Xin Meng,<sup>a</sup> Feize Zheng,<sup>a</sup> Yinghe zhang,<sup>\*b</sup> Jun Liu,<sup>\*a</sup>

<sup>a</sup> Guangdong Provincial Engineering Technology Research Centre for New Energy Materials and Devices, School of Materials and Energy, Guangdong University of Technology, Guangzhou, 510006, PR China

<sup>b</sup> School of Science, Harbin Institute of Technology (Shenzhen), University Town, Shenzhen 518055, PR China

\*Corresponding authors: [yinghe.zhang@googlemail.com](mailto:yinghe.zhang@googlemail.com) (Y. zhang) ;

[junliu23@gdut.edu.cn](mailto:junliu23@gdut.edu.cn) (J. Liu)

## Experimental Section

**Materials.** Chemicals for electrolyte preparation: N, N-Dimethylformamide (99.9%, Aladdin), ethylenediamine (AR, Guangzhou), Thiourea (99%, Aladdin), and Manganese bis(trifluoromethanesulfonate) (98%, BIDE) were directly used as received. Materials for anode and cathode preparation: Mn plates (99.8%, Tuopu metal materials of China) were polished to remove the surface passivation layer before using; 3,4,9,10-Perylenetetracarboxylic diimide (PTCDI, 95%, Macklin), N-methyl-2-pyrrolidone (NMP, 99%, Aladdin), poly(vinylidene fluoride) (PVDF, average Mw ~400000,

Aladdin), and Carbon coated aluminum foil (Canrd) were directly used. Glass fiber film (GF/D 1823-047, Whatman) was used as separator after being tailored into discs.

**Electrolyte preparation.** 0.5M Mn(OTF)<sub>2</sub> was dissolved in electrolyte with DMF:EDA=3:1, which was used as the experimental electrolyte. Meanwhile, 0.5M Mn(OTF)<sub>2</sub> was dissolved in DMF, DMF: thiourea= 3:1 and water as electrolytes of control group.

**Electrode preparation.** Mn plate was polished with sandpaper to remove the external passivation layer. PTCDI was mixed with Super C, and PVDF at the ratio of 7:2:1 using NMP as dispersing agent to produce a homogeneous slurry, which was pasted on carbon coated aluminum foil and then dried at 120°C for about 12h to obtain the PTCDI cathode. The loading mass of PTCDI cathode is ca. 1 mg cm<sup>-2</sup>.

**Battery assembly.** In Mn||Mn symmetric cells, Mn metal plates were used as the electrodes with glass fiber film as separator in various electrolytes for measurements. In preparation of Mn||PTCDI full cells, PTCDI cathodes were paired with Mn metal anodes and two pieces of glass fiber film as separator in electrolytes.

**Electrochemistry measurements.** The galvanostatic charge-discharge was performed with a battery tester (LAND) at room temperature, and the cyclic voltammetry (CV) was measured on an electrochemical workstation (CHI 660E). All electrochemical tests are performed under

environmental conditions.

**Characterization.** Morphology and microstructure observation for samples were measured by scanning electron microscopy (SEM, Hitachi Regulus 8100). The surface element analysis of the composite materials was conducted by X-ray photoelectron spectroscopy (XPS, K-Alpha 1063).

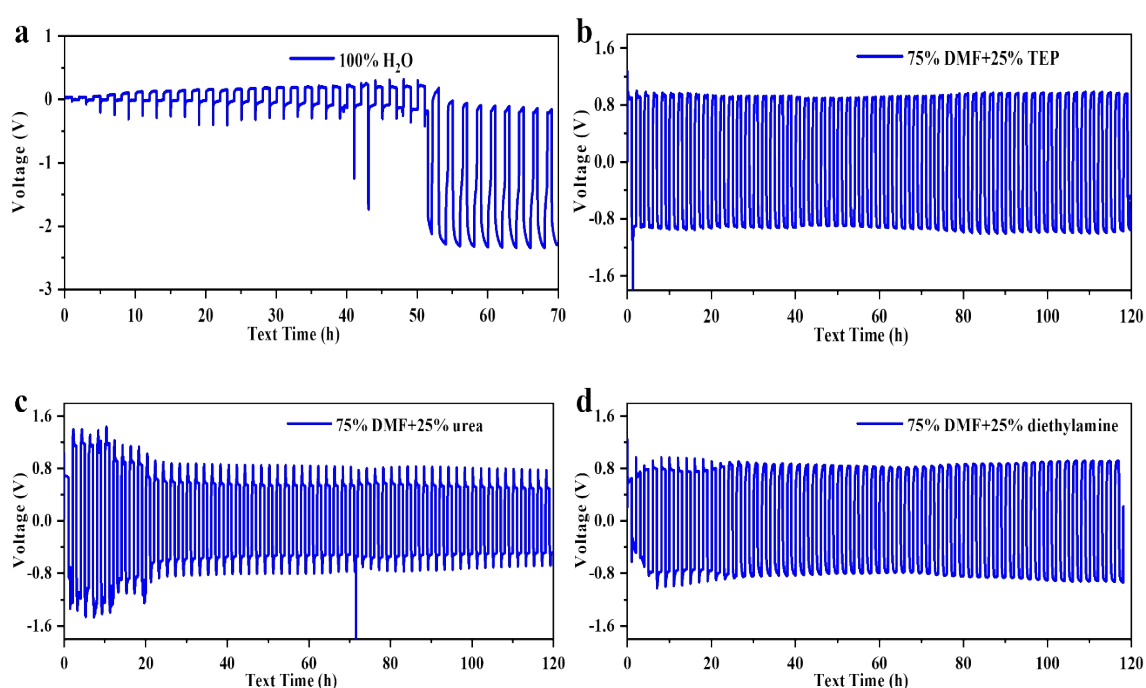

**Figure S1.** Long-term galvanostatic cycling of Mn||Mn symmetrical cells in various electrolyte with 0.5 M Mn(OTF)<sub>2</sub> at current density of 0.2 mA cm<sup>-2</sup> and the area capacity for Mn anode is 0.2 mAh cm<sup>-2</sup>. a) the electrolyte of 100% H<sub>2</sub>O. b) the electrolyte of 75% DMF and 25% triethyl phosphate (TEP). c) the electrolyte of 75% DMF and 25% urea. d) the electrolyte of 75% DMF and 25% diethylamine.

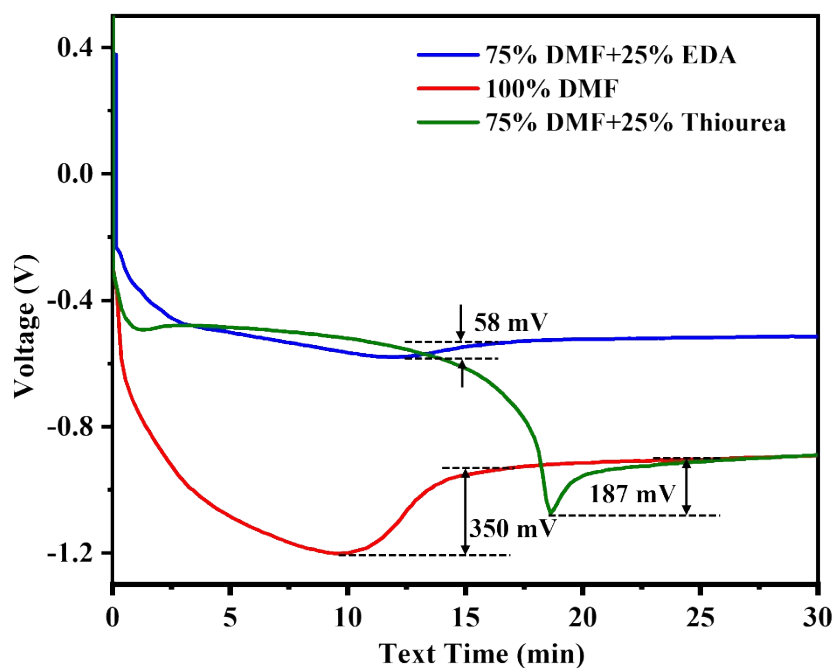

**Figure S2.** Nucleation overpotential of Mn||Mn symmetric cells in various electrolytes with 0.5 M Mn(OTF)<sub>2</sub> at current density of 0.2 mA cm<sup>-2</sup> and the area capacity for Mn anode is 0.2 mAh cm<sup>-2</sup>.

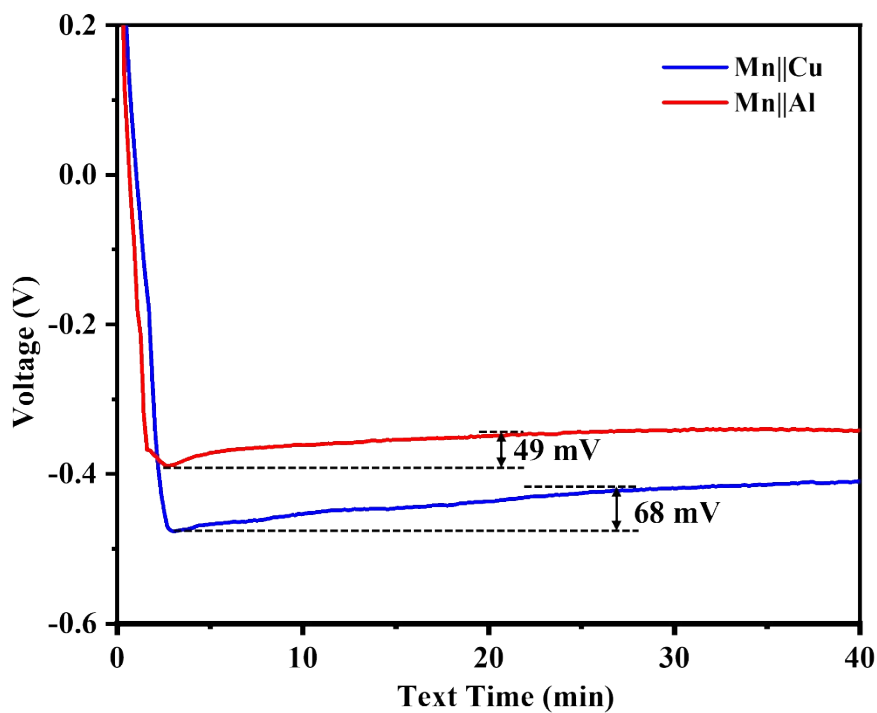

**Figure S3.** Nucleation overpotential of Mn||Cu and Mn||Al cells in DMF: EDA (3:1) electrolyte with 0.5 M Mn(OTF)<sub>2</sub> at current density of 0.2 mA cm<sup>-2</sup>.

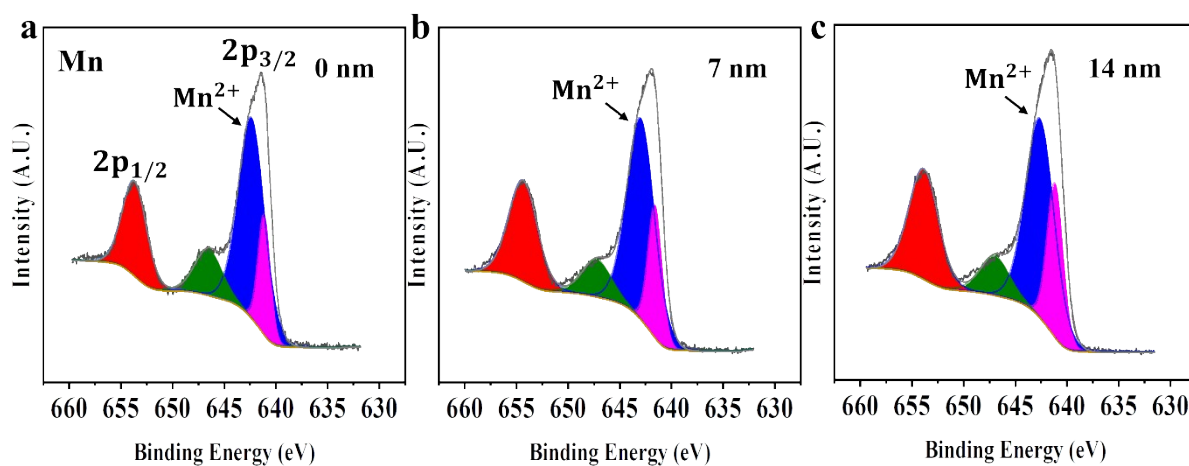

**Figure S4.** XPS spectra of Mn2p for Mn metal anode after 50 cycles in Mn||PTCDI full cells at C-rate of 0.5 C. a-c, In-depth XPS spectra of Mn2p after Ar<sup>+</sup> etching for 0 nm (a), 7 nm (b) and 14 nm (c).
